# Supplementary material for: Changes in Health Care Use Among Undocumented Patients, 2014-2018
Source: PubMed Central journal article supplement (PMC7936260; doi:10.1001/jamanetworkopen.2021.0763), 2021-03-05

## Supplementary Online Content

Nwadiuko J, German J, Chapla K, et al. Changes in health care use among undocumented patients, 2014-2018. *JAMA Netw Open*. 2021;4(3):e210763. doi:10.1001/jamanetworkopen.2021.0763

**eAppendix.** Note on Quarterly Adjusted Averages

**eTable 1.** Breakdown of Cohort by Age Groups

**eTable 2.** Difference-in-Differences for Completed Primary Care Visits (Restricted to Those With Any Scheduled Visits in 2014)

**eTable 3.** Difference-in-Differences for Completed Primary Care Visits for Adults and Children Who Were Not Hospitalized During the 2014-2018 Period

**eTable 4.** Difference-in-Differences for Completed Primary Care Visits (Restricted to Those Between the Ages of 19 and 69 as of 2018)

**eTable 5.** Difference-in-Differences for Completed Primary Care Visits (Estimated Under Gaussian Distribution)

**eTable 6.** Difference-in-Differences of Completed Primary Care Visits for Latino Children Medicaid Recipients Compared to Non-Latino Medicaid Children Controls for Completed Primary Care Visits (Restricted to Those Between the Ages of 5 and 18 as of 2018)

**eTable 7.** Secondary Outcome Difference-in-Differences

**eTable 8.** Difference-in-Differences for Emergency Room Admission Rates

**eTable 9.** Difference-in-differences Among Primary and Secondary Outcomes for All Children Under Age 18 as of 2018

**eTable 10.** Unadjusted Estimates and Standard Deviations of Primary and Secondary Outcomes

**eFigure 1.** Study Selection

**eFigure 2.** Adjusted Trends in Scheduled Primary Care Appointments Among Adults

**eFigure 3.** Adjusted Trends in Scheduled Primary Care Appointments Among Children

**eFigure 4.** No Show/Cancellation Rate Among Adults

**eFigure 5.** Adjusted Trends in No Show/Cancellation Rate Among Children

**eFigure 6.** Number of Community Arrests by Immigration and Customs Enforcement in Baltimore City via the Syracuse University Transactional Records Access Clearinghouse

This supplementary material has been provided by the authors to give readers additional information about their work.

### eAppendix. Note on Quarterly Adjusted Averages

Predicted estimates for Quarterly Adjusted Averages are as derived from the following model:

$$\begin{aligned} \ln(\mu_{ij}) = & \beta_0 + \beta_1 \text{Cohort}_i + \beta_2 \text{Quarter}_{ij} + \beta_3 \text{Cohort}_i \times \text{Quarter}_{ij} + \beta_4 \text{Birthyear}_i + \beta_5 \text{Gender}_i \\ & + \beta_6 \text{Elixhauser}_i + \beta_7 \text{Gender}_i \times \text{Quarter}_{ij} + \beta_8 \text{BirthYear}_i \times \text{Quarter}_{ij} \\ & + \ln(\text{time}_{ij}) \end{aligned}$$

Where *Cohort* represents either the Medicaid control group or Medicaid-ineligible group; *Age* represents Age as of 2018, *Gender* represents self-reported gender, and *Elixhauser* represents the Elixhauser Comorbidity weight. The offset for no-show/cancellation rates is  $\ln(\text{number of scheduled visits})$  instead of  $\ln(\text{time})$ . The outcome  $\mu$  specifies the number of encounters (or number of missed visits in the case of no-show/cancellations), the *i* subscript refers to each individual, and the *j* subscript specifies the quarter.

**eTable 1: Breakdown of cohort by age groups**

| <b>Ages (as of 2018)</b> | <b>Control</b> | <b>%</b>    | <b>Cohort</b> | <b>%</b>    | <b>Total</b>  |
|--------------------------|----------------|-------------|---------------|-------------|---------------|
| <b>0-5<sup>a</sup></b>   | 2,906          | 13.4%       | 5             | 0.3%        | <b>2,911</b>  |
| <b>6-9</b>               | 3,971          | 18.4%       | 29            | 1.9%        | <b>4,000</b>  |
| <b>10-19</b>             | 7287           | 33.7%       | 161           | 10.7%       | <b>7448</b>   |
| <b>20-29</b>             | 3182           | 14.7%       | 231           | 15.3%       | <b>3413</b>   |
| <b>30-39</b>             | 1242           | 5.8%        | 404           | 26.8%       | <b>1646</b>   |
| <b>40-49</b>             | 922            | 4.3%        | 352           | 23.4%       | <b>1274</b>   |
| <b>50-59</b>             | 1,128          | 5.2%        | 186           | 12.3%       | <b>1314</b>   |
| <b>60-69</b>             | 857            | 3.9%        | 86            | 5.8%        | <b>943</b>    |
| <b>70-99</b>             | 121            | 0.6%        | 52            | 3.4%        | <b>173</b>    |
| <b>Total</b>             | <b>21625</b>   | <b>100%</b> | <b>1,508</b>  | <b>100%</b> | <b>23,122</b> |

<sup>a</sup> Excluded from all but supplementary analyses. See Methods (Selection Criteria) for details.

**eTable2. Difference-in-differences for Completed Primary Care Visits (restricted to those with any scheduled visits in 2014)**

|          | Average Adjusted Annual Number of Encounters (per 100 people) |       |                   |       |                                                          |        |
|----------|---------------------------------------------------------------|-------|-------------------|-------|----------------------------------------------------------|--------|
|          | Medicaid-Ineligible Patients                                  |       | Medicaid-Patients |       | Difference in Differences Estimate (Incident Rate Ratio) |        |
|          | Pre                                                           | Post  | Pre               | Post  | Estimate (95% CI)                                        | p      |
| Adults   | 215.6                                                         | 115.2 | 208.3             | 157.5 | 0.7 (0.7-0.8)                                            | <0.001 |
| Children | 237.8                                                         | 107.1 | 180.0             | 127.4 | 0.6 (0.5-0.8)                                            | <0.001 |

**eTable 3: Difference-in-differences for Completed Primary Care Visits for Adults and Children Who Were Not Hospitalized During the 2014-2018 Period**

|          | Average Adjusted Annual Number of Encounters (per 100 people) |       |                   |       |                                                          |        |
|----------|---------------------------------------------------------------|-------|-------------------|-------|----------------------------------------------------------|--------|
|          | Medicaid-Ineligible Patients                                  |       | Medicaid Patients |       | Difference in Differences Estimate (Incident Rate Ratio) |        |
|          | Pre                                                           | Post  | Pre               | Post  | Estimate (95% CI)                                        | p      |
| Adults   | 171.3                                                         | 104.8 | 175.2             | 132.8 | 0.8 (0.7-0.9)                                            | <0.001 |
| Children | 185.4                                                         | 108.8 | 168.3             | 122.1 | 0.8 (0.7-1.0)                                            | 0.02   |

**eTable 4: Difference-in-differences for Completed Primary Care Visits (restricted to those between the ages of 19 and 69 as of 2018)**

| Average Adjusted Annual Number of Encounters (per 100 people) |       |                                     |       |                                                          |        |
|---------------------------------------------------------------|-------|-------------------------------------|-------|----------------------------------------------------------|--------|
| Medicaid-Ineligible Patients (per 100 persons)                |       | Medicaid Patients (per 100 persons) |       | Difference in Differences Estimate (Incident Rate Ratio) |        |
| Pre                                                           | Post  | Pre                                 | Post  | Estimate (95% CI)                                        | P      |
| 178.5                                                         | 117.5 | 192.6                               | 154.1 | 0.8 (0.8-0.9)                                            | <0.001 |

**eTable 5: Difference-in-differences for Completed Primary Care Visits (estimated under Gaussian distribution)**

|          | Average Adjusted Annual Number of Encounters (per 100 people) |       |                   |       |                                    |        |
|----------|---------------------------------------------------------------|-------|-------------------|-------|------------------------------------|--------|
|          | Medicaid-Ineligible Patients                                  |       | Medicaid-Patients |       | Difference in Differences Estimate |        |
|          | Pre                                                           | Post  | Pre               | Post  | Estimate (95% CI)                  | p      |
| Adults   | 184.2                                                         | 132.4 | 208.2             | 173.4 | -0.2 (-0.2 - -0.1)                 | <0.001 |
| Children | 192.7                                                         | 114.9 | 178.4             | 128.4 | -0.3 (-0.5 - -0.1)                 | <0.001 |

**eTable 6: Difference-in-differences of Completed Primary Care visits for Latino children Medicaid recipients compared to non-Latino Medicaid children controls for Completed Primary Care Visits (restricted to those between the ages of 5 and 18 as of 2018)**

| Average Adjusted Annual Number of Encounters (per 100 people) |       |                   |       |                                                          |      |
|---------------------------------------------------------------|-------|-------------------|-------|----------------------------------------------------------|------|
| Latino Medicaid recipients                                    |       | Medicaid Patients |       | Difference in Differences Estimate (Incident Rate Ratio) |      |
| Pre                                                           | Post  | Pre               | Post  | Estimate (95% CI)                                        | P    |
| 196.2                                                         | 141.2 | 167.5             | 122.3 | 1.0 (1.0- 1.0)                                           | 0.47 |



**eTable 7 Secondary Outcome Difference-in-Differences**

|                                      | Average Adjusted Annual Number of Encounters (per 100 people) |       |                                |       |                                                          |        |
|--------------------------------------|---------------------------------------------------------------|-------|--------------------------------|-------|----------------------------------------------------------|--------|
|                                      | Medicaid-Ineligible Patients <sup>a</sup>                     |       | Medicaid Patients <sup>a</sup> |       | Difference in Differences Estimate (Incident Rate Ratio) |        |
|                                      | Pre                                                           | Post  | Pre                            | Post  | Estimate (95% CI)                                        | p      |
| <b>Scheduled Primary Care Visits</b> |                                                               |       |                                |       |                                                          |        |
| Adults                               | 297.2                                                         | 230.4 | 402.8                          | 364.2 | 0.8 (0.7-0.9)                                            | <0.001 |
| Children                             | 263.2                                                         | 167.1 | 321                            | 235   | 0.8 (0.7-1.0)                                            | 0.014  |
| <b>No Show/Cancellation Rates</b>    |                                                               |       |                                |       |                                                          |        |
| Adults                               | 39.3                                                          | 40.9  | 51.4                           | 53.3  | 1.0 (0.9-1.1)                                            | 0.97   |
| Children                             | 28.8                                                          | 31.4  | 46.4                           | 46.3  | 1.1 (0.9-1.3)                                            | 0.31   |

<sup>a</sup>Scheduled visit values are per 100 persons. No-show/cancellation rates are represented as percentages of all scheduled visits.

**eTable 8. Difference-in-differences for Emergency Room Admission Rates**

|          | Average Adjusted Annual Number of Encounters (per 100 people) |      |                       |      |                                                          |       |
|----------|---------------------------------------------------------------|------|-----------------------|------|----------------------------------------------------------|-------|
|          | Medicaid-Ineligible Patients (%)                              |      | Medicaid Patients (%) |      | Difference in Differences Estimate (Incident Rate Ratio) |       |
|          | Pre                                                           | Post | Pre                   | Post | Estimate (95% CI)                                        | p     |
| Adults   | 3.8                                                           | 4.7  | 7.9                   | 6.6  | 1.5 (1.0-2.3)                                            | 0.064 |
| Children | 1.6                                                           | 4.6  | 2.9                   | 3.8  | 2.2 (0.5-9.0)                                            | 0.29  |

**eTable 9. Difference-in-differences among Primary and Secondary Outcomes for all children under age 18 as of 2018**

|                            | Average Adjusted Annual Number of Encounters (per 100 people) |       |                                |       |                                                          |       |
|----------------------------|---------------------------------------------------------------|-------|--------------------------------|-------|----------------------------------------------------------|-------|
|                            | Medicaid-Ineligible Patients <sup>a</sup>                     |       | Medicaid Patients <sup>a</sup> |       | Difference in Differences Estimate (Incident Rate Ratio) |       |
|                            | Pre                                                           | Post  | Pre                            | Post  | Estimate (95% CI)                                        | p     |
| Completed Visits           | 285.8                                                         | 127.2 | 256.8                          | 147.9 | 0.8 (0.65-0.92)                                          | 0.003 |
| Scheduled Visits           | 335.8                                                         | 172.4 | 409.8                          | 259.5 | 0.8 (0.68-0.96)                                          | 0.016 |
| No Show/Cancellation Rates | 27.4                                                          | 31.5  | 44.1                           | 45.4  | 1.1 (0.95-1.32)                                          | 0.182 |
| Emergency Room Visits      | 6.7                                                           | 14.4  | 42.4                           | 36.6  | 2.3 (1.10-4.95)                                          | 0.027 |
| Inpatient Discharges       | 5.7                                                           | 3.3   | 3.6                            | 2.4   | 0.9 (0.15- 5.19)                                         | 0.90  |

<sup>a</sup>Scheduled visit values are per 100 persons. No-show/cancellation rates are represented as percentages of all scheduled visits.

**eTable 10. Unadjusted estimates and standard deviations of Primary and Secondary Outcomes**

|                                    | Average Annual Number of Encounters (per 100 people) |                 |                                |                 | Unadjusted Incident Rate Ratio |
|------------------------------------|------------------------------------------------------|-----------------|--------------------------------|-----------------|--------------------------------|
|                                    | Medicaid-Ineligible Patients <sup>a</sup>            |                 | Medicaid Patients <sup>a</sup> |                 |                                |
|                                    | Pre (st. dev.)                                       | Post (st. dev.) | Pre (st. dev.)                 | Post (st. dev.) |                                |
| Completed Visits--Adults           | 236.6<br>(216.3)                                     | 334.2 (448.0)   | 308.4<br>(317.8)               | 511.6 (668.5)   | 0.9                            |
| Completed Visits—<br>Children      | 237.0<br>(162.3)                                     | 290.3 (293.2)   | 260.3<br>(206.8)               | 380 (326.3)     | 0.8                            |
| Emergency Room<br>Visits—Adults    | 18.7<br>(66.6)                                       | 37.2 (113.3)    | 91.3<br>(304.2)                | 166.8 (502.3)   | 1.1                            |
| Emergency Room Visits-<br>Children | 7.3 (34.2)                                           | 35.7 (131.1)    | 47.8<br>(121.2)                | 86.8 (184.8)    | 2.7                            |
| Inpatient Discharges-<br>Adults    | 12.1<br>(68.2)                                       | 8.7 (39.6)      | 29.2<br>(119.7)                | 40.6 (157.1)    | 0.5                            |
| Inpatient Discharges—<br>Children  | 5.4 (37.0)                                           | 12.1 (105.2)    | 5.4 (41.3)                     | 8.2 (53.0)      | 1.5                            |

**eFigure 1. Study Selection**

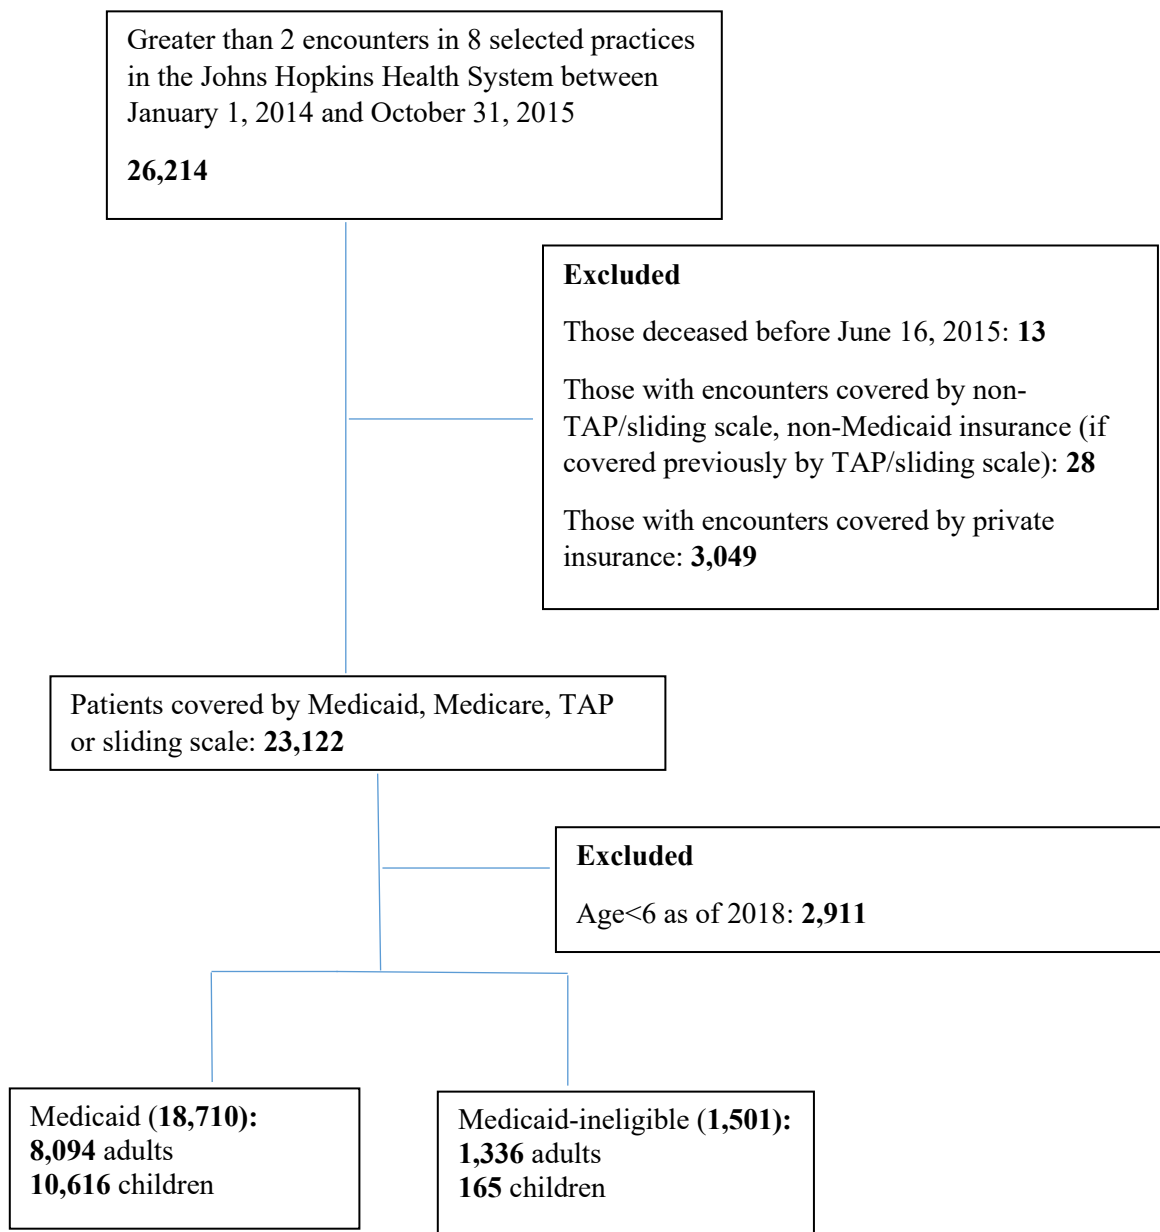

eFigure 2 Adjusted Trends in Scheduled Primary Care Appointments among Adults

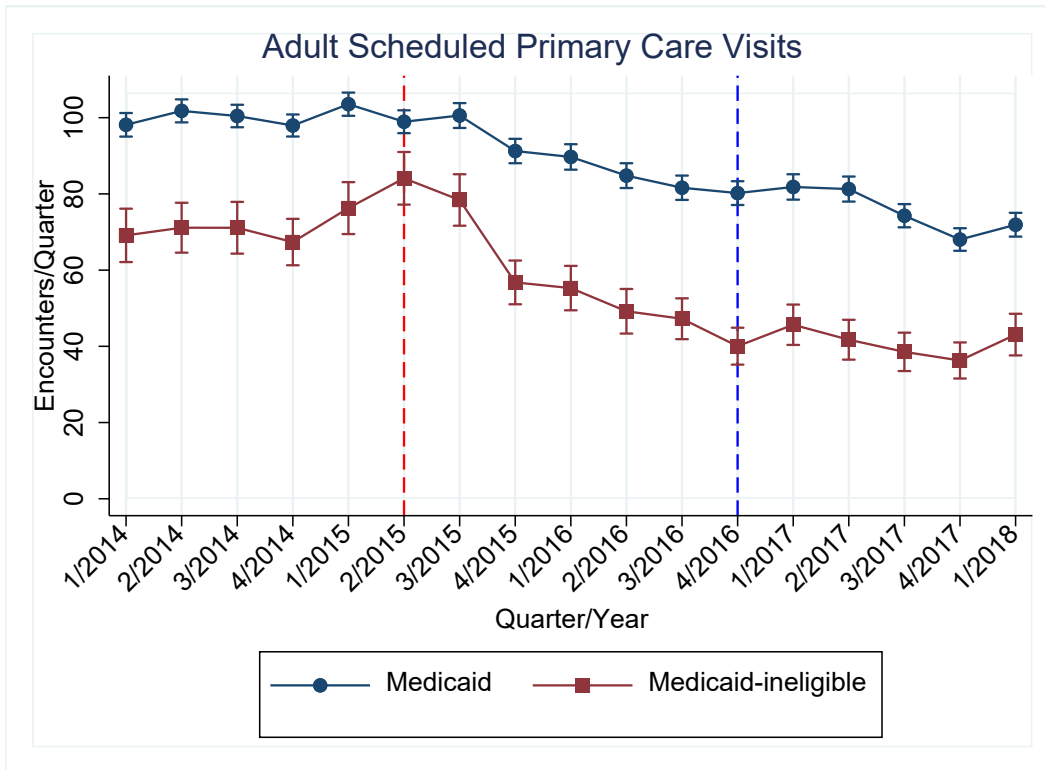

eFigure 3 Adjusted Trends in Scheduled Primary Care Appointments among Children

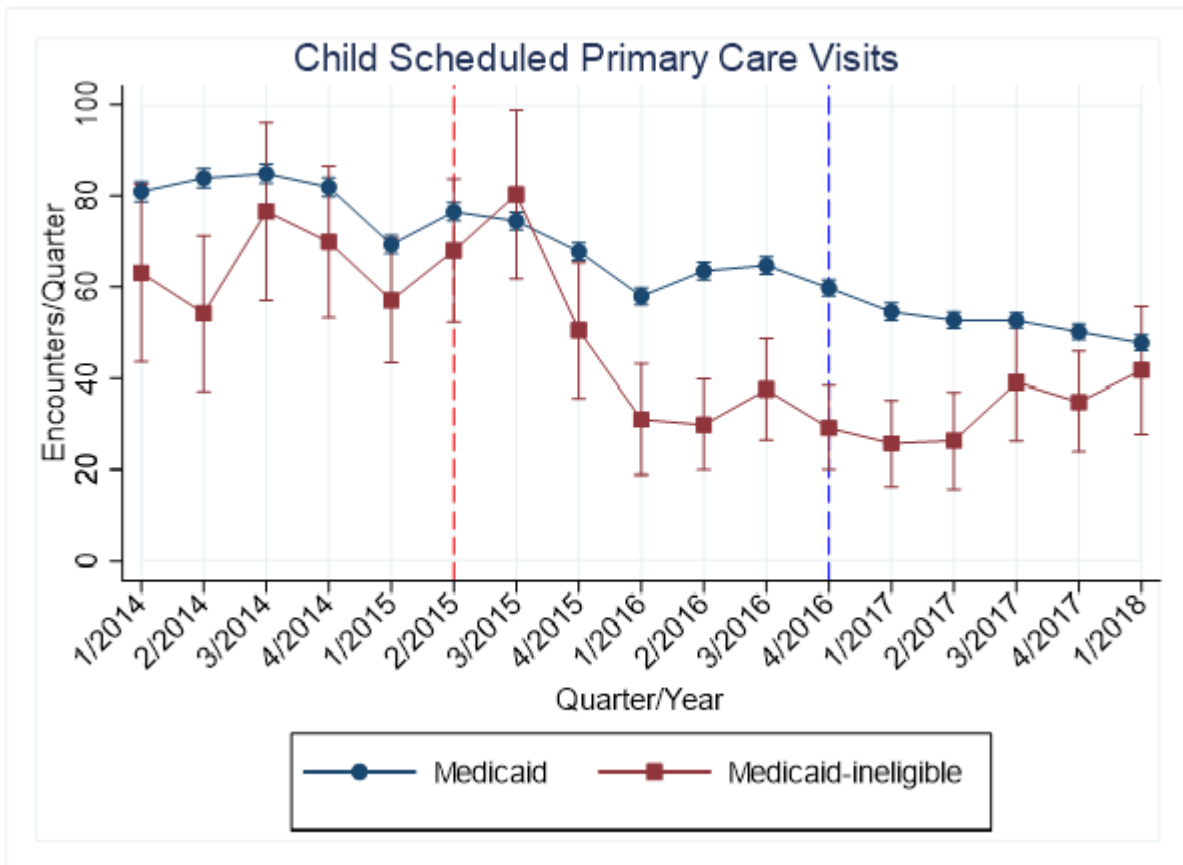

--Announcement of Donald Trump's candidacy for president  
--2016 General Presidential Election

eFigure 4 No Show/Cancellation Rate Among Adults

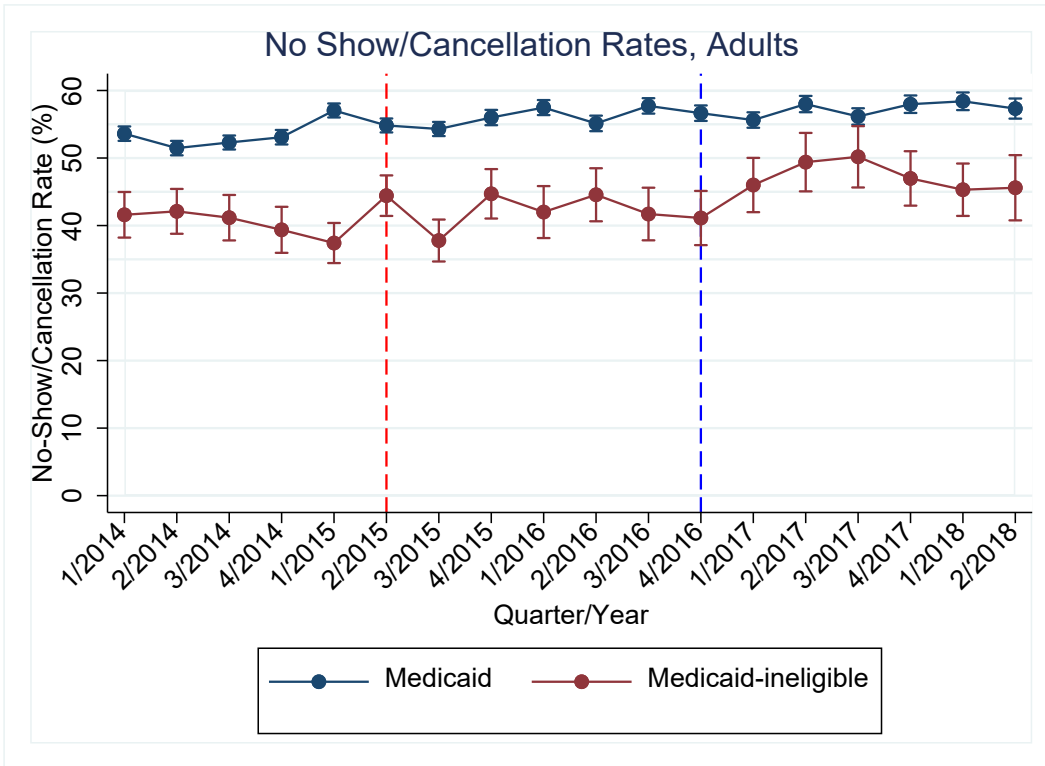

--Announcement of Donald Trump's candidacy for president  
--2016 General Presidential Election



**eFigure 5 Adjusted Trends in No-Show Cancellation Rate among Children**

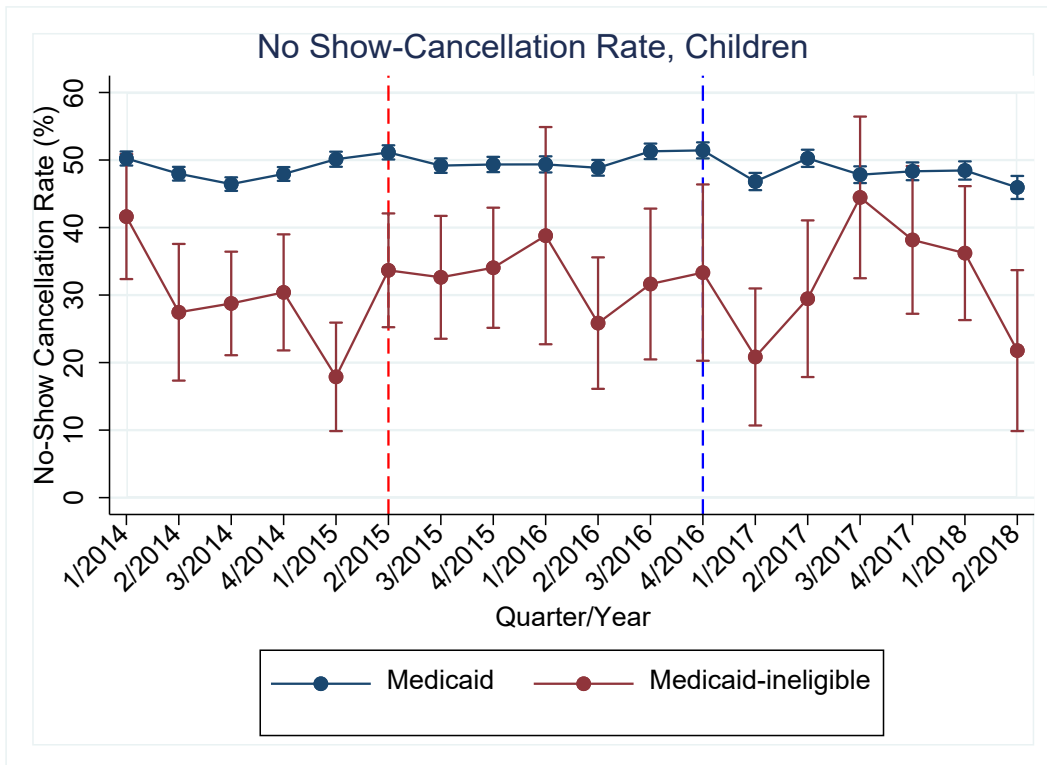

--Announcement of Donald Trump's candidacy for president  
 --2016 General Presidential Election

**eFigure 6: Number of community arrests by Immigration and Customs Enforcement in Baltimore City via the Syracuse University Transactional Records Access Clearinghouse**

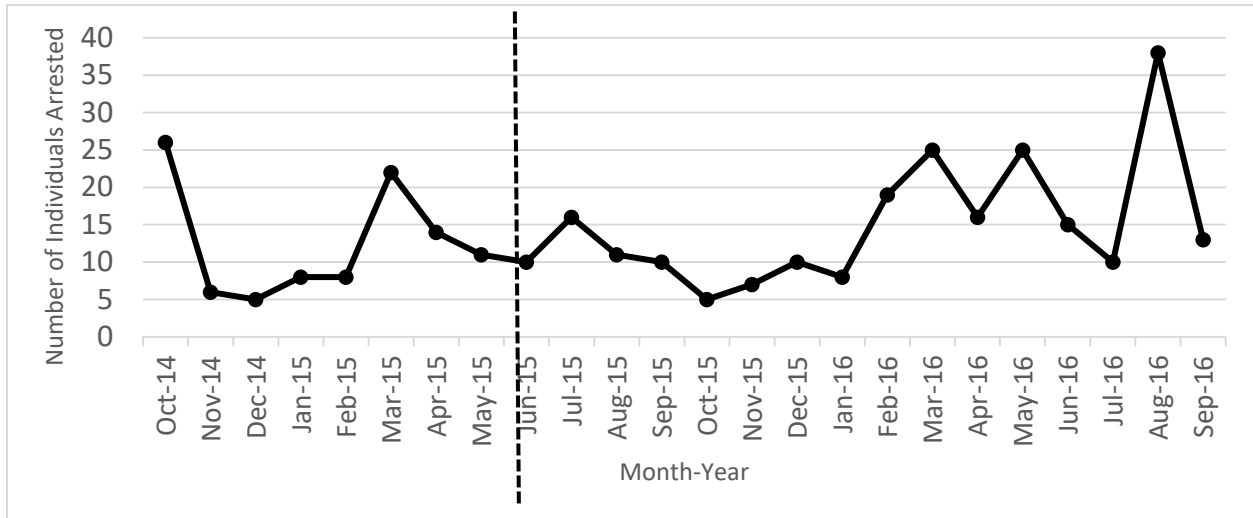

Supplement: jamanetwopen-e210763-s001.pdf [file jamanetwopen-e210763-s001.pdf]
